# Supplementary material for: Surface-Enhanced Raman Spectroscopy Using a Silver Nanostar Substrate for Neonicotinoid Pesticides Detection
Source: MDPI journal article supplement (doi:10.3390/s24020373), 2024-01-08
Supplement: s1 [file s1]

# Surface-Enhanced Raman Spectroscopy Using a Silver Nanostar Substrate for Neonicotinoid Pesticides Detection

Norhayati Abu Bakar <sup>1,2,\*</sup>, Marco Fronzi <sup>3</sup> and Joseph George Shapter <sup>1,\*</sup>

<sup>1</sup> Australian Institute for Bioengineering and Nanotechnology, University of Queensland, St. Lucia, Brisbane, QLD 4072, Australia

<sup>2</sup> Institute of Microengineering and Nanoelectronic, Universiti Kebangsaan Malaysia, UKM Bangi, Selangor 43600, Malaysia

<sup>3</sup> School of Chemical and Biomedical Engineering, University of Melbourne, Parkville, VIC 3010, Australia; marco.fronzi@gmail.com

\* Correspondence: norhayati.ab@ukm.edu.my (N.A.B.); [n.abubakar@uq.edu.au](mailto:n.abubakar@uq.edu.au) or [j.shapter@uq.edu.au](mailto:j.shapter@uq.edu.au) (J.G.S.)

## Supporting Information:

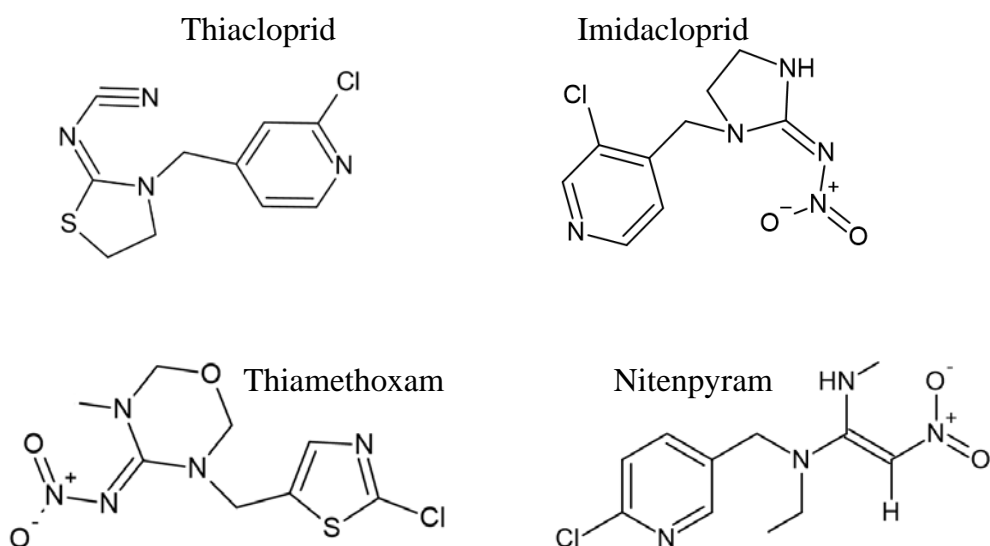

Figure S1: Molecule structures for 4 types of neonicotinoid pesticides

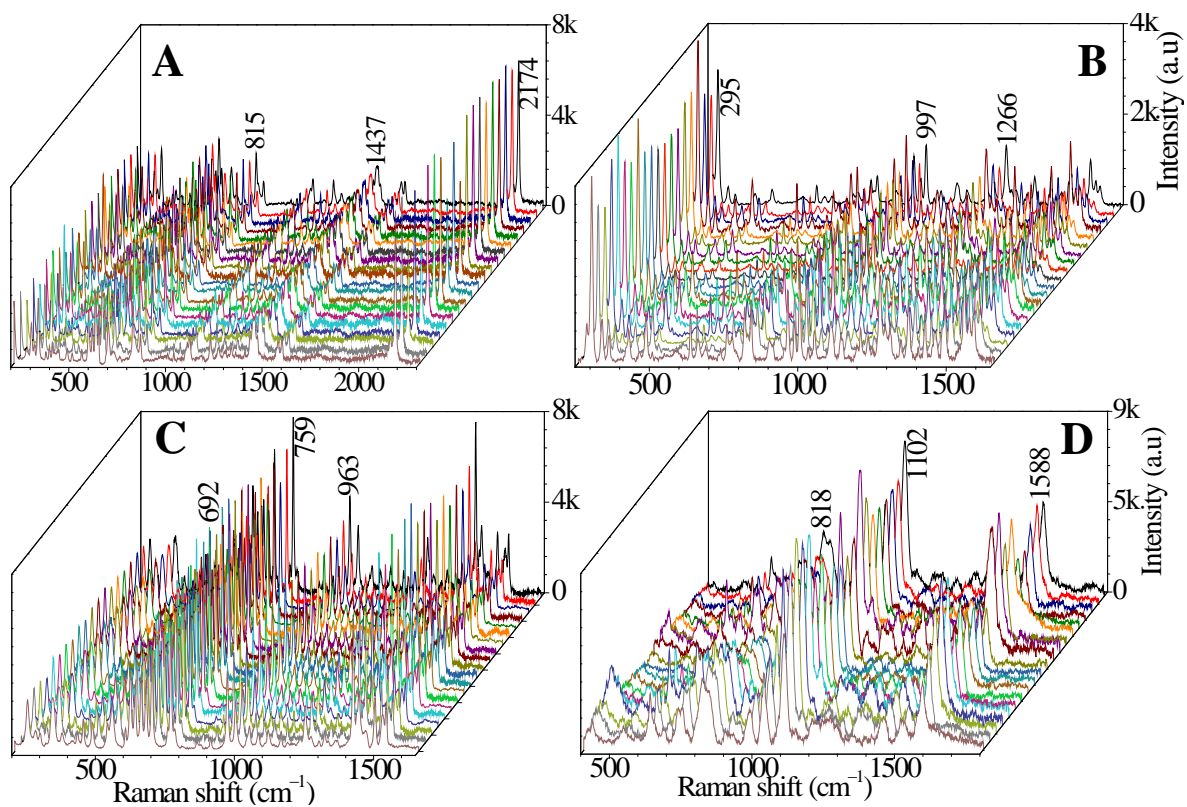

Figure S2: SERS measurement of 1 mg/mL of neonicotinoids pesticide for 20 spots on the 10 layers AgNs substrate (A) thiacloprid, (B) imidacloprid, (C) thiamethoxam and (D) nitenpyram.

Table S1: The vibrational assignment for the characteristic peaks of thiacloprid powder, SERS signal of thiacloprid and DFT calculation.

| Experimentally observed peaks              |                           | Density<br>Functional<br>Theory (DFT)<br>( $\text{cm}^{-1}$ ) [1] | Assignments                                                                              |
|--------------------------------------------|---------------------------|-------------------------------------------------------------------|------------------------------------------------------------------------------------------|
| Thiacloprid<br>powder ( $\text{cm}^{-1}$ ) | SERS ( $\text{cm}^{-1}$ ) |                                                                   |                                                                                          |
| 274                                        | 289                       | 265                                                               | Skeletal vibration                                                                       |
| 309                                        | 329                       | 307                                                               | Skeletal vibration                                                                       |
| 398                                        | 399                       | 399                                                               | Skeletal vibration                                                                       |
| 429                                        | 432                       | 433                                                               | Skeletal vibration                                                                       |
| 479                                        | 475                       | 508                                                               | Skeletal vibration                                                                       |
| 548                                        | 550                       | 536                                                               | C-N bending                                                                              |
| 586                                        | 585                       | 586                                                               | C-N bending, C-S stretching                                                              |
| 608                                        | 606                       | 610                                                               | ring bending, $\text{CH}_2$ rocking                                                      |
| 626                                        | 628                       | 616                                                               | C-Cl bending, C-N bending, C-H bending                                                   |
| 638                                        | 635                       | 646                                                               | C-C bending, C-S stretching                                                              |
| 688                                        | 689                       | 682                                                               | C-S stretching, C-N bending, ring bending, C-Cl stretching                               |
| 710                                        | 708                       | 708                                                               | C-S stretching, $\text{CH}_2$ rocking, C-N bending, ring bending                         |
| 815                                        | 815                       | 829                                                               | C-H bending, $\text{CH}_2$ rocking, C-N stretching, ring bending, C-Cl stretching        |
| 996                                        | 995                       | 995                                                               | C-N stretching, $\text{CH}_2$ rocking, C-H bending, ring stretching                      |
| 1019                                       | 1025                      | 1046                                                              | $\text{CH}_2$ rocking                                                                    |
| 1096                                       | 1111                      | 1082                                                              | C-N stretching, $\text{CH}_2$ bending, C-S stretching, $\text{CH}_2$ wagging deformation |
| 1140                                       | 1141                      | 1125                                                              | C-Cl stretching, ring stretching, C-H bending                                            |
| 1172                                       | 1167                      | 1165                                                              | C-H bending, ring stretching                                                             |
| 1186                                       | 1214                      | 1181                                                              | C-N stretching, $\text{CH}_2$ bending, ring stretching                                   |
| 1243                                       | 1244                      | 1238                                                              | $\text{CH}_2$ bending, ring stretching, $\text{CH}_2$ rocking                            |
| 1289                                       | 1287                      | 1278                                                              | $\text{CH}_2$ bending, ring stretching, $\text{CH}_2$ rocking                            |
| 1332                                       | 1328                      | 1357                                                              | $\text{CH}_2$ bending, ring stretching, $\text{CH}_2$ rocking                            |
| 1388                                       | 1393                      | 1402                                                              | $\text{CH}_2$ bending, ring stretching, $\text{CH}_2$ rocking                            |
| 1423                                       | 1422                      | 1429                                                              | $\text{CH}_2$ bending                                                                    |
| 1447                                       | 1437                      | 1443                                                              | $\text{CH}_2$ bending                                                                    |
| 1478                                       | 1461                      | 1469                                                              | $\text{CH}_2$ bending                                                                    |
| 1563                                       | 1569                      | 1577                                                              | ring stretching                                                                          |
| 1585                                       | 1587                      | 1595                                                              | C=N stretching, N-C-S bending                                                            |
| 2183                                       | 2174                      | 2185                                                              | $\text{C}\equiv\text{N}$ stretching                                                      |

Table S2: The vibrational assignment for the characteristic peaks of imidacloprid powder, SERS signal of imidacloprid and DFT calculation.

| Experimentally observed peaks               |                           | Density<br>Functional<br>Theory (DFT)<br>( $\text{cm}^{-1}$ ) [2] | Assignments                                                          |
|---------------------------------------------|---------------------------|-------------------------------------------------------------------|----------------------------------------------------------------------|
| Imidacloprid<br>powder ( $\text{cm}^{-1}$ ) | SERS ( $\text{cm}^{-1}$ ) |                                                                   |                                                                      |
| 283                                         | 295                       | 274                                                               | C-H rocking, C-Cl bending                                            |
| 322                                         | 329                       | 306                                                               | C-N wagging, C-N bending                                             |
| 476                                         | 477                       | 453                                                               | C-N rocking, C-N bending, C-Cl stretching, C-C wagging, C-N twisting |
| 633                                         | 628                       | 622                                                               | C-N bending, C-C bending                                             |
| 751                                         | 751                       | 768                                                               | N-O bending, C-N bending, C-C stretching, C-H rocking                |
| 816                                         | 811                       | 815                                                               | C-N bending, C-C stretching, C-Cl stretching, C-H rocking            |
| 999                                         | 997                       | 1008                                                              | C-N bending, C-N bending                                             |
| 1109                                        | 1106                      | 1126                                                              | C-H bending, C-Cl stretching                                         |
| 1142                                        | 1140                      | 1197                                                              | C-C bending, C-H wagging                                             |
| 1190                                        | 1190                      | 1217                                                              | C-H twisting                                                         |
| 1245                                        | 1242                      | 1254                                                              | C-C twisting, C-H wagging, C-N stretching, N-N stretching            |
| 1277                                        | 1266                      | 1280                                                              | N-O stretching, C-H twisting, C-H wagging, C-H bending               |
| 1295                                        | 1300                      | 1282                                                              | C-H wagging, C-H bending, N-O stretching                             |
| 1371                                        | 1363                      | 1376                                                              | C-C stretching, C-N stretching, C-H wagging                          |
| 1448                                        | 1450                      | 1449                                                              | C-C stretching, C-N stretching, C-H bending                          |
| 1483                                        | 1486                      | 1483                                                              | C-H bending                                                          |
| 1551                                        | 1552                      | 1547                                                              | C-C stretching                                                       |
| 1583                                        | 1583                      | 1606                                                              | C-C stretching                                                       |

Table S3: The vibrational assignment for the characteristic peaks of thiamethoxam powder, SERS signal of thiamethoxam and DFT calculation.

| Experimentally observed peaks               |                           | Density<br>Functional<br>Theory (DFT)<br>( $\text{cm}^{-1}$ ) [3] | Assignments                                            |
|---------------------------------------------|---------------------------|-------------------------------------------------------------------|--------------------------------------------------------|
| Thiamethoxam<br>powder ( $\text{cm}^{-1}$ ) | SERS ( $\text{cm}^{-1}$ ) |                                                                   |                                                        |
| 423                                         | 423                       | 426                                                               | H-C-H rocking, C-N-C bending,<br>C-N-C bending         |
| 445                                         | 447                       | 445                                                               | C-Cl stretching, C-S-C bending                         |
| 478                                         | 478                       | 489                                                               | C-S-C wagging                                          |
| 530                                         | 534                       | 529                                                               | C-N-C bending, C-S-C wagging,<br>C-H-C twisting        |
| 549                                         | 549                       | 545                                                               | C-N-C-H wagging, C-H wagging                           |
| 596                                         | 597                       | 601                                                               | C-N wagging, H-N-C wagging, C-<br>N-C-S wagging        |
| 615                                         | 614                       | 616                                                               | C-S-Cl stretching                                      |
| 631                                         | 631                       | 636                                                               | C-S stretching, C-N-C-H wagging,<br>C-N wagging        |
| 652                                         | 653                       | 653                                                               | C-S stretching, C-N-C-H wagging                        |
| 669                                         | 669                       | 686                                                               | O-C-N-C wagging, C-N-C-H<br>wagging, C-N wagging       |
| 692                                         | 692                       | 716                                                               | C-H wagging, C-N wagging                               |
| 759                                         | 759                       | 757                                                               | C-N-N-O wagging, N-C-N-N<br>wagging                    |
| 902                                         | 902                       | 912                                                               | C-H wagging, C-H-C-S wagging,<br>C-H-C-N wagging       |
| 963                                         | 963                       | 952                                                               | C-H scissoring                                         |
| 993                                         | 993                       | 983                                                               | O-N-O stretching, N-N stretching,<br>H-C-O-C wagging   |
| 1043                                        | 1042                      | 1053                                                              | H-C-N stretching, H-C-N-C<br>wagging, H-C-O-C wagging  |
| 1074                                        | 1072                      | 1088                                                              | C-N stretching, H-C-N scissoring,<br>H-C-N-C wagging   |
| 1109                                        | 1108                      | 1116                                                              | H-C-N scissoring, H-C-N-C<br>wagging                   |
| 1155                                        | 1156                      | 1145                                                              | H-C-N scissoring, H-C-N-C<br>wagging                   |
| 1243                                        | 1243                      | 1239                                                              | H-C-O scissoring, H-C-N<br>scissoring, H-C-N-C wagging |
| 1314                                        | 1312                      | 1315                                                              | O-C-H scissoring, H-C-N-C<br>wagging                   |
| 1358                                        | 1351                      | 1369                                                              | N-N-C scissoring, O-C-H<br>scissoring, H-C-N-C wagging |
| 1414                                        | 1415                      | 1388                                                              | H-C-N scissoring, H-C-C<br>scissoring                  |
| 1436                                        | 1435                      | 1435                                                              | H-C-O scissoring, H-C-N<br>scissoring                  |

|      |      |      |                                                     |
|------|------|------|-----------------------------------------------------|
| 1493 | 1494 | 1489 | H-C-H scissoring, H-C-N-C wagging                   |
| 1532 | 1534 | 1525 | H-C-H scissoring, H-C-O scissoring, H-C-N-C wagging |

Table S4: The vibrational assignment for the characteristic peaks of nitenpyram powder, SERS signal of nitenpyram and DFT calculation.

| Experimentally observed peaks          |                           | Density Functional Theory (DFT) ( $\text{cm}^{-1}$ ) [4] | Assignments                                                            |
|----------------------------------------|---------------------------|----------------------------------------------------------|------------------------------------------------------------------------|
| Nitenpyram powder ( $\text{cm}^{-1}$ ) | SERS ( $\text{cm}^{-1}$ ) |                                                          |                                                                        |
| 630                                    | 634                       | 635                                                      | C-C-C bending                                                          |
| 824                                    | 818                       | 856                                                      | O-N-O wagging                                                          |
| 985                                    | 984                       | 996                                                      | Ring breathing                                                         |
| 1104                                   | 1102                      | 1093                                                     | C-Cl stretching                                                        |
| 1133                                   | 1144                      | 1116                                                     | C-N stretching                                                         |
| 1282                                   | 1284                      | 1288                                                     | C-C stretching                                                         |
| 1442                                   | 1450                      | 1465                                                     | -CH <sub>3</sub> bending, -CH <sub>2</sub> scissoring, ring stretching |
| 1518                                   | 1516                      | 1515                                                     | -NO <sub>2</sub> stretching                                            |
| 1586                                   | 1588                      | 1602                                                     | C=C stretching                                                         |

## References

1. Cañamares, M.V.; Feis, A. Surface-Enhanced Raman Spectra of the Neonicotinoid Pesticide Thiacloprid. *J. Raman Spectrosc.* **2013**, *44*, 1126–1135, doi:https://doi.org/10.1002/jrs.4339.
2. Creedon, N.; Lovera, P.; Moreno, J.G.; Nolan, M.; O’Riordan, A. Highly Sensitive SERS Detection of Neonicotinoid Pesticides. Complete Raman Spectral Assignment of Clothianidin and Imidacloprid. *J. Phys. Chem. A* **2020**, *124*, 7238–7247, doi:10.1021/acs.jpca.0c02832.
3. Gao, Y.; Xu, M.-L.; Xiong, J. Raman and SERS Spectra of Thiamethoxam and the Ag<sub>3</sub>–Thiamethoxam Complex: An Experimental and Theoretical Investigation. *J. Environ. Sci. Heal. Part B* **2019**, *54*, 665–675, doi:10.1080/03601234.2019.1631099.
4. Wang, Q.; Liu, Y.; Bai, Y.; Yao, S.; Wei, Z.; Zhang, M.; Wang, L.; Wang, L. Superhydrophobic SERS Substrates Based on Silver Dendrite-Decorated Filter Paper for Trace Detection of Nitenpyram. *Anal. Chim. Acta* **2019**, *1049*, 170–178, doi:https://doi.org/10.1016/j.aca.2018.10.039.
